# Supplementary material for: Review article: A systematic review and future prospects of flood vulnerability indices
Source: Copernicus journal article supplement (doi:10.5194/nhess-21-1513-2021), 2021-05-17
Supplement: Supplementary file 1 [file nhess-21-1513-2021-supplement.pdf]

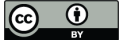

*Supplement of*

**Review article: A systematic review and future prospects of flood vulnerability indices**

**Luana Lavagnoli Moreira et al.**

*Correspondence to:* Mariana Madruga de Brito ([mariana.brito@ufz.de](mailto:mariana.brito@ufz.de))

The copyright of individual parts of the supplement might differ from the article licence.

**Table S1 - List of the reviewed papers.**

| Nº | Author(s)                | Year | Study area country | Spacial scale   | Region classification | Number of indicators | Reduction of indicators | Temporal dynamics | Normalization method                   | Aggregation method            | Weighting method                | Uncertainty and sensitivity analysis | Validation |
|----|--------------------------|------|--------------------|-----------------|-----------------------|----------------------|-------------------------|-------------------|----------------------------------------|-------------------------------|---------------------------------|--------------------------------------|------------|
| 1  | Abbas and Routray        | 2014 | Sudan              | Household       | Urban and rural       | 20                   | None                    | Before            | Categorical scale                      | Linear                        | Equal weighting                 | No                                   | Yes        |
| 2  | Abbas et al.             | 2018 | Pakistan           | Household       | Rural                 | 15                   | None                    | Both              | Min-Max                                | Linear                        | PCA – weighted by factor scores | No                                   | No         |
| 3  | Abebe et al.             | 2018 | Canada             | Neighborhood    | Urban                 | 7                    | None                    | Before            | Unspecified                            | Bayesian Belief Network (BBN) | Equal weighting                 | Yes (sensitivity)                    | Yes        |
| 4  | Ahmad and Afzal          | 2019 | Pakistan           | Household       | Both                  | 36                   | None                    | Both              | None (All indicators in the same unit) | Geometric                     | Equal weighting                 | No                                   | No         |
| 5  | Amadio, Mysiak and Marzi | 2019 | Italy              | Neighborhood    | Both                  | 7                    | None                    | Before            | None (All indicators in the same unit) | Non-compensatory aggregation  | Equal weighting                 | Yes (fuzzy)                          | No         |
| 6  | Andrade et al.           | 2018 | Brazil             | Neighborhood    | Urban                 | 11                   | None                    | Before            | Categorical scale                      | Linear                        | Equal weighting                 | No                                   | No         |
| 7  | Antwi et al.             | 2015 | Ghana              | Neighborhood    | Rural                 | 22                   | None                    | Before            | Ranking                                | Linear                        | None (selected by authors)      | No                                   | No         |
| 8  | Armenakis et al.         | 2017 | Canada             | Neighborhood    | Urban                 | 15                   | None                    | Before            | Distance from the group leader         | Linear                        | None (selected by authors)      | No                                   | Yes        |
| 9  | Aroca-Jimenez et al.     | 2017 | Spain              | Neighborhood    | Urban                 | 46                   | PCA                     | Before            | Other (to percentage or per capita)    | Linear                        | PCA – weighted by factor scores | No                                   | No         |
| 10 | Aroca-Jimenez et al.     | 2018 | Spain              | Neighborhood    | Urban                 | 28                   | PCA                     | Before            | Other (to percentage or per capita)    | Linear                        | PCA – weighted by factor scores | No                                   | No         |
| 11 | Baeck et al.             | 2014 | South Korea        | Group of cities | Urban and rural       | 16                   | None                    | Both              | Z-score                                | Linear                        | PCA – weighted by factor scores | No                                   | Yes        |

**Table S1 - List of the reviewed papers.**

| Nº | Author(s)                    | Year | Study area country            | Spacial scale | Region classification | Number of indicators | Reduction of indicators | Temporal dynamics | Normalization method                   | Aggregation method | Weighting method                   | Uncertainty and sensitivity analysis | Validation |
|----|------------------------------|------|-------------------------------|---------------|-----------------------|----------------------|-------------------------|-------------------|----------------------------------------|--------------------|------------------------------------|--------------------------------------|------------|
| 12 | Balica et al.                | 2009 | Romania, Germany and Cambodia | Various       | Urban                 | 66                   | None                    | Before            | Distance from the group leader         | Geometric          | Equal weighting                    | No                                   | No         |
| 13 | Barros et al.                | 2015 | Brazil                        | Neighborhood  | Urban                 | 13                   | None                    | Before            | Min-Max                                | Linear             | Equal weighting                    | No                                   | No         |
| 14 | Beringer and Kaewsuk         | 2018 | Tailand                       | Household     | Urban                 | 48                   | None                    | Before            | Min-Max                                | Linear             | Equal weighting                    | No                                   | No         |
| 15 | Bertilsson et al.            | 2019 | Brazil                        | Neighborhood  | Urban                 | 5                    | None                    | Both              | None (All indicators in the same unit) | Geometric          | Equal weighting                    | No                                   | No         |
| 16 | Carlier et al.               | 2018 | France                        | City          | Rural                 | 17                   | PCA                     | After             | Ranking                                | Linear             | PCA – weighted by factor scores    | No                                   | No         |
| 17 | Chakraborty and Mukhopadhyay | 2019 | India                         | Neighborhood  | Both                  | 16                   | None                    | Before            | Ranking                                | Linear             | Analytical Hierarchy Process (AHP) | No                                   | Yes        |
| 18 | Chaliha et al.               | 2012 | India                         | Household     | Rural                 | 37                   | None                    | Both              | Min-Max                                | Linear             | Public opinion                     | No                                   | No         |
| 19 | Chen and Chen                | 2012 | China                         | City          | Urban                 | 20                   | None                    | Before            | Min-Max                                | Linear             | Analytical Hierarchy Process (AHP) | No                                   | No         |
| 20 | Chen and Leandro             | 2019 | Germany                       | Neighborhood  | Urban                 | 7                    | None                    | Before            | Unspecified                            | Linear             | None (selected by authors)         | Yes (sensitivity)                    | No         |
| 21 | Daksiya et al.               | 2017 | Indonesia                     | Neighborhood  | Urban                 | 7                    | None                    | Before            | Min-Max                                | Linear             | PROMETHEE-MCDA technique           | No                                   | No         |
| 22 | Dandapat and Panda           | 2017 | India                         | Neighborhood  | Urban and rural       | 17                   | None                    | Before            | Min-Max                                | Linear             | Analytical Hierarchy Process (AHP) | No                                   | No         |

**Table S1 - List of the reviewed papers.**

| Nº | Author(s)                 | Year | Study area country | Spacial scale | Region classification | Number of indicators | Reduction of indicators                 | Temporal dynamics | Normalization method           | Aggregation method | Weighting method                                                        | Uncertainty and sensitivity analysis | Validation |
|----|---------------------------|------|--------------------|---------------|-----------------------|----------------------|-----------------------------------------|-------------------|--------------------------------|--------------------|-------------------------------------------------------------------------|--------------------------------------|------------|
| 23 | De Brito et al.           | 2018 | Brazil             | Neighborhood  | Urban                 | 11                   | Based of experts opinon (Delphi survey) | Before            | Functions                      | Linear             | Analytical Hierarchy Process (AHP) and Analytical Network Process (ANP) | No                                   | Yes        |
| 24 | Debortoli et al.          | 2017 | Brazil             | City          | Urban and rural       | 11                   | None                                    | Before            | Unspecified                    | Linear             | None (selected by authors)                                              | No                                   | Yes        |
| 25 | Erena and Worku           | 2019 | Ethiopia           | Household     | Urban                 | 24                   | None                                    | Before            | Min-Max                        | Geometric          | Unequal weighting method                                                | No                                   | No         |
| 26 | Feizizadeh and Kienberger | 2017 | Austria            | Neighborhood  | Urban and rural       | 17                   | None                                    | Before            | Min-Max                        | Linear             | Analytical Hierarchy Process (AHP)                                      | Yes                                  | No         |
| 27 | Fekete                    | 2009 | Germany            | Neighborhood  | Urban and rural       | 41                   | PCA                                     | Before            | Ranking                        | Linear             | Equal weighting                                                         | No                                   | Yes        |
| 28 | Fernadez et al.           | 2016 | Portugal           | Neighborhood  | Urban                 | 13                   | PCA                                     | Before            | Z-score                        | Linear             | Equal weighted and PCA – weighted by factor scores                      | Yes (sensitivity)                    | No         |
| 29 | Frolova et al.            | 2017 | Russia             | City          | Urban and rural       | 10                   | None                                    | Before            | Distance from the group leader | Linear             | Expert opinion                                                          | No                                   | No         |
| 30 | Fujiki and Renard         | 2018 | France             | Neighborhood  | Urban                 | 20                   | PCA                                     | Before            | Z-score                        | Linear             | PCA – weighted by factor scores                                         | No                                   | No         |
| 31 | Garbutt et al.            | 2015 | England            | Neighborhood  | Urban and rural       | 53                   | None                                    | Before            | Binary standard                | Linear             | Equal weighting                                                         | No                                   | No         |
| 32 | Gerrard                   | 2018 | United Kingdom     | Neighborhood  | Rural                 | 27                   | None                                    | Before            | Z-score                        | Linear             | Unspecified                                                             | No                                   | No         |

**Table S1 - List of the reviewed papers.**

| Nº | Author(s)              | Year | Study area country | Spacial scale | Region classification | Number of indicators | Reduction of indicators | Temporal dynamics | Normalization method           | Aggregation method | Weighting method                                             | Uncertainty and sensitivity analysis | Validation |
|----|------------------------|------|--------------------|---------------|-----------------------|----------------------|-------------------------|-------------------|--------------------------------|--------------------|--------------------------------------------------------------|--------------------------------------|------------|
| 33 | Ghosh and Kar          | 2018 | India              | Neighborhood  | Urban and rural       | 12                   | None                    | Before            | Ranking                        | Linear             | Analytical Hierarchy Process (AHP)                           | No                                   | No         |
| 34 | Grosso et al.          | 2015 | Portugal           | Neighborhood  | Urban and rural       | 39                   | PCA                     | Before            | Division by total              | Linear             | PCA – weighted by factor scores                              | No                                   | No         |
| 35 | Gu et al.              | 2018 | China              | Neighborhood  | Urban                 | 18                   | None                    | Before            | Unspecified                    | Linear             | PCA – weighted by factor scores                              | No                                   | No         |
| 36 | Guo et al.             | 2014 | China              | City          | Urban                 | 16                   | None                    | Before            | Unspecified                    | Geometric          | Analytical Hierarchy Process (AHP) and entropy weight method | Yes                                  | No         |
| 37 | Hernández-Uribe et al. | 2017 | Mexico             | Neighborhood  | Urban                 | 23                   | None                    | Before            | Distance from the group leader | Geometric          | Equal weighting                                              | No                                   | No         |
| 38 | Ibrahim et al.         | 2017 | Malaysia           | City          | Rural                 | 6                    | None                    | Before            | Unspecified                    | Linear             | None (selected by authors)                                   | No                                   | No         |
| 39 | Jamshed et al.         | 2019 | Pakistan           | Household     | Rural                 | 43                   | None                    | Both              | Division by total              | Linear             | None method (select by authors)                              | No                                   | No         |
| 40 | Jha and Gundimeda      | 2019 | India              | District      | Both                  | 26                   | Yes                     | Before            | Min-Max                        | Linear             | Unspecified                                                  | No                                   | No         |
| 41 | Jung et al.            | 2014 | South Korea        | City          | Urban and rural       | 11                   | PCA                     | Before            | Z-score                        | Linear             | Delphi technique                                             | No                                   | No         |
| 42 | Kablan et al.          | 2017 | Ivory Coast        | Neighborhood  | Urban                 | 13                   | None                    | Before            | Min-Max                        | Linear             | Unequal weighting method                                     | No                                   | No         |

**Table S1 - List of the reviewed papers.**

| <b>Nº</b> | <b>Author(s)</b>      | <b>Year</b> | <b>Study area country</b> | <b>Spacial scale</b> | <b>Region classification</b> | <b>Number of indicators</b> | <b>Reduction of indicators</b> | <b>Temporal dynamics</b> | <b>Normalization method</b>            | <b>Aggregation method</b> | <b>Weighting method</b>            | <b>Uncertainty and sensitivity analysis</b> | <b>Validation</b> |
|-----------|-----------------------|-------------|---------------------------|----------------------|------------------------------|-----------------------------|--------------------------------|--------------------------|----------------------------------------|---------------------------|------------------------------------|---------------------------------------------|-------------------|
| 43        | Kirby et al.          | 2019        | Netherland                | District             | Both                         | 25                          | Yes                            | Before                   | Min-Max                                | Linear                    | PCA – weighted by factor scores    | No                                          | No                |
| 44        | Koks et al.           | 2015        | Netherland                | Neighborhood         | Urban and rural              | 10                          | None                           | Before                   | Distance from the group leader         | Linear                    | Equal weighting                    | No                                          | No                |
| 45        | Komi et al.           | 2016        | Togo                      | City                 | Urban and rural              | 37                          | None                           | Before                   | Z-score                                | Linear                    | Analytical Hierarchy Process (AHP) | No                                          | No                |
| 46        | Kotzee and Reyers     | 2016        | South Africa              | City                 | Urban and rural              | 24                          | Pearson’s correlation          | Before                   | Min-Max                                | Linear                    | PCA – weighted by factor scores    | No                                          | No                |
| 47        | Kubal et al.          | 2009        | Germany                   | Neighborhood         | Urban                        | 16                          | None                           | Before                   | Binary standard                        | Linear                    | Hot Spot analysis                  | No                                          | No                |
| 48        | Lee and Choi          | 2018        | South Korea               | Neighborhood         | Urban and rural              | 9                           | None                           | Before                   | Min-Max                                | Linear and geometric      | Equal weighting                    | No                                          | No                |
| 49        | Lee and Choi          | 2019        | South Korea               | District             | Both                         | 6                           | None                           | Before                   | Min-Max                                | Linear and geometric      | Equal weighting                    | No                                          | No                |
| 50        | Li et al.             | 2013        | China                     | City                 | Urban                        | 12                          | None                           | Before                   | Min-Max                                | Linear                    | Analytical Hierarchy Process (AHP) | No                                          | No                |
| 51        | Lianxiao and Morimoto | 2019        | Japan                     | Neighborhood         | Urban                        | 11                          | None                           | Before                   | Min-Max                                | Linear                    | Entropy method                     | No                                          | No                |
| 52        | Liu and Li            | 2016        | China                     | Household            | Rural                        | 8                           | None                           | Before                   | Min-Max                                | Linear                    | PCA – weighted by factor scores    | No                                          | No                |
| 53        | Liu et al.            | 2018        | China                     | Household            | Rural                        | 12                          | None                           | Before                   | None (All indicators in the same unit) | Linear                    | Equal weighting                    | No                                          | No                |

**Table S1 - List of the reviewed papers.**

| Nº | Author(s)                     | Year | Study area country | Spacial scale | Region classification | Number of indicators | Reduction of indicators | Temporal dynamics | Normalization method                   | Aggregation method   | Weighting method                                         | Uncertainty and sensitivity analysis | Validation |
|----|-------------------------------|------|--------------------|---------------|-----------------------|----------------------|-------------------------|-------------------|----------------------------------------|----------------------|----------------------------------------------------------|--------------------------------------|------------|
| 54 | Lotfata and Ambinakudige      | 2019 | United States      | Neighborhood  | Both                  | 15                   | None                    | Before            | Ranking                                | Linear               | Unspecified                                              | No                                   | No         |
| 55 | Mavhura et al.                | 2017 | Zimbabwe           | Neighborhood  | Rural                 | 17                   | PCA                     | Before            | Unspecified                            | Linear               | Equal weighting                                          | No                                   | No         |
| 56 | Miguez and Veról              | 2017 | Brazil             | Neighborhood  | Urban                 | 5                    | None                    | After             | None (All indicators in the same unit) | Linear               | Analytical Hierarchy Process (AHP)                       | No                                   | No         |
| 57 | Müller                        | 2013 | Chile              | Neighborhood  | Urban                 | 12                   | None                    | Before            | Distance from the group leader         | Linear               | Public opinion                                           | No                                   | No         |
| 58 | Müller et al.                 | 2011 | Chile              | Neighborhood  | Urban                 | 10                   | None                    | Before            | Division by total                      | Linear               | Public opinion                                           | Yes (sensitivity)                    | No         |
| 59 | Munyai, Musyoki and Nethengwe | 2019 | South Africa       | Household     | Rural                 | 14                   | None                    | Before            | Distance from the group leader         | Geometric            | Equal weighting                                          | No                                   | No         |
| 60 | Mwale et al.                  | 2015 | Malawi             | Neighborhood  | Rural                 | 37                   | None                    | Before            | Unspecified                            | Linear               | Public opinion                                           | No                                   | No         |
| 61 | Nahiduzzaman et al.           | 2015 | Saudi Arabia       | Neighborhood  | Urban                 | 8                    | None                    | Before            | Unspecified                            | Linear               | Unspecified                                              | No                                   | No         |
| 62 | Nasiri et al.                 | 2019 | Malaysia           | District      | Urban                 | 25                   | None                    | Before            | Unspecified                            | Linear               | Analytical Hierarchy Process (AHP)                       | No                                   | No         |
| 63 | Nazeer and Bork               | 2019 | Pakistan           | District      | Both                  | 18                   | None                    | Before            | Min-Max                                | Linear and geometric | Division by variance and PCA – weighted by factor scores | Yes                                  | No         |
| 64 | Nelson et al.                 | 2015 | United States      | Neighborhood  | Urban                 | 38                   | PCA                     | Before            | Z-score                                | Linear               | PCA – weighted by factor scores                          | No                                   | No         |
| 65 | Nguyen and Nguyen             | 2019 | Vietnamita         | Neighborhood  | Both                  | 24                   | None                    | Before            | Min-Max                                | Linear               | Equal weighting                                          | No                                   | No         |

**Table S1 - List of the reviewed papers.**

| Nº | Author(s)                           | Year | Study area country | Spacial scale | Region classification | Number of indicators | Reduction of indicators | Temporal dynamics | Normalization method                   | Aggregation method | Weighting method                                        | Uncertainty and sensitivity analysis | Validation |
|----|-------------------------------------|------|--------------------|---------------|-----------------------|----------------------|-------------------------|-------------------|----------------------------------------|--------------------|---------------------------------------------------------|--------------------------------------|------------|
| 66 | Ni et al.                           | 2010 | China              | Neighborhood  | Urban and rural       | 9                    | None                    | Before            | Min-Max                                | Linear             | Unspecified                                             | No                                   | Yes        |
| 67 | Okazawa et al.                      | 2011 | Global             | State         | Urban and rural       | 11                   | None                    | Both              | Distance from the group leader         | Linear             | Division by Max                                         | No                                   | No         |
| 68 | Papathoma-Köhle, Schlögl and Fuchs  | 2019 | Austria            | Household     | Urban                 | 27                   | Yes                     | Before            | Z-score                                | Linear             | Division by total                                       | No                                   | No         |
| 69 | Peng                                | 2018 | Taiwan             | Neighborhood  | Urban and rural       | 19                   | None                    | Before            | None (All indicators in the same unit) | Linear             | Analytical Hierarchy Process (AHP) and Delphi technique | No                                   | No         |
| 70 | Quezada-Hofflinger et al.           | 2017 | Peru               | Neighborhood  | Urban                 | 20                   | PCA                     | Before            | None (All indicators in the same unit) | Linear             | PCA – weighted by factor scores                         | No                                   | No         |
| 71 | Rahman et al.                       | 2016 | Saudi Arabia       | Neighborhood  | Urban                 | 8                    | None                    | Before            | Distance from the group leader         | Linear             | Equal weighting                                         | No                                   | No         |
| 72 | Rana and Routray                    | 2018 | Pakistan           | Neighborhood  | Urban                 | 34                   | None                    | Before            | None (All indicators in the same unit) | Linear             | None (selected by authors)                              | No                                   | No         |
| 73 | Remo et al.                         | 2015 | United States      | Various       | Urban and rural       | 17                   | PCA                     | Before            | Min-Max                                | Linear             | PCA – weighted by factor scores                         | No                                   | No         |
| 74 | Reyes-Olvera and Gutiérrez-González | 2016 | Mexico             | City          | Urban and rural       | 10                   | None                    | Before            | None (All indicators in the same unit) | Linear             | PCA – weighted by factor scores                         | No                                   | No         |
| 75 | Rezende et al.                      | 2019 | Brazil             | Neighborhood  | Urban                 | 9                    | None                    | Before            | Categorical scale                      | Linear             | None (selected by authors)                              | No                                   | Yes        |



**Table S1 - List of the reviewed papers.**

| <b>Nº</b> | <b>Author(s)</b>        | <b>Year</b> | <b>Study area country</b> | <b>Spacial scale</b> | <b>Region classification</b> | <b>Number of indicators</b> | <b>Reduction of indicators</b> | <b>Temporal dynamics</b> | <b>Normalization method</b>            | <b>Aggregation method</b> | <b>Weighting method</b>         | <b>Uncertainty and sensitivity analysis</b> | <b>Validation</b> |
|-----------|-------------------------|-------------|---------------------------|----------------------|------------------------------|-----------------------------|--------------------------------|--------------------------|----------------------------------------|---------------------------|---------------------------------|---------------------------------------------|-------------------|
| 76        | Roder and Sofia         | 2017        | Italy                     | Neighborhood         | Urban and rural              | 16                          | PCA                            | Before                   | Z-score                                | Linear                    | PCA – equal weighting           | No                                          | No                |
| 77        | Rogelis et al.          | 2016        | Colombia                  | Neighborhood         | Urban and rural              | 29                          | PCA                            | Both                     | Min-Max                                | Linear                    | PCA – equal weighting           | Yes (sensitivity)                           | No                |
| 78        | Roncancio and Nardocci  | 2016        | Brazil                    | Neighborhood         | Urban                        | 24                          | PCA                            | Before                   | Z-score                                | Linear                    | PCA – equal weighting           | No                                          | No                |
| 79        | Ronco et al.            | 2015        | Switzerland               | Neighborhood         | Urban and rural              | 14                          | None                           | Before                   | Unspecified                            | Linear                    | Public opinion                  | No                                          | No                |
| 80        | Sam et al.              | 2017        | India                     | Household            | Rural                        | 30                          | None                           | Before                   | Min-Max                                | Linear                    | Equal weighting                 | No                                          | No                |
| 81        | Schuster-Wallace et al. | 2018        | Canada                    | Neighborhood         | Urban                        | 8                           | None                           | Before                   | Distance from the group leader         | Linear                    | Public opinion                  | No                                          | No                |
| 82        | Shah et al.             | 2018        | Pakistan                  | City                 | Urban and rural              | 35                          | None                           | Before                   | None (All indicators in the same unit) | Geometric                 | Expert opinion                  | No                                          | No                |
| 83        | Shiau et al.            | 2012        | Taiwan                    | Neighborhood         | Urban and rural              | 5                           | None                           | Before                   | None (All indicators in the same unit) | Geometric                 | Division by total               | No                                          | No                |
| 84        | Tapsell et al.          | 2002        | United States             | Neighborhood         | Urban and rural              | 7                           | None                           | Before                   | Z-score                                | Linear                    | Equal weighting                 | No                                          | No                |
| 85        | Tate et al.             | 2016        | United States             | Neighborhood         | Urban                        | 12                          | None                           | After                    | Min-Max                                | Geometric                 | Division by total               | No                                          | No                |
| 86        | Török                   | 2018        | Romania                   | Neighborhood         | Urban and rural              | 28                          | PCA                            | Before                   | Z-score                                | Linear                    | PCA – weighted by factor scores | No                                          | No                |

**Table S1 - List of the reviewed papers.**

| Nº | Author(s)     | Year | Study area country | Spacial scale   | Region classification | Number of indicators | Reduction of indicators | Temporal dynamics | Normalization method           | Aggregation method                           | Weighting method                                             | Uncertainty and sensitivity analysis | Validation |
|----|---------------|------|--------------------|-----------------|-----------------------|----------------------|-------------------------|-------------------|--------------------------------|----------------------------------------------|--------------------------------------------------------------|--------------------------------------|------------|
| 87 | Wu et al.     | 2015 | China              | Group of cities | Urban and rural       | 9                    | None                    | Before            | Min-Max                        | Linear                                       | Analytical Hierarchy Process (AHP) and expert scoring method | No                                   | Yes        |
| 88 | Xiong et al.  | 2019 | China              | City            | Both                  | 25                   | None                    | Before            | Min-max                        | Linear                                       | Analytical Hierarchy Process (AHP)                           | No                                   | No         |
| 89 | Yang et al.   | 2018 | China              | Neighborhood    | Urban and rural       | 15                   | None                    | Before            | Distance from the group leader | Fuzzy Comprehensive Evaluation Method (FCEM) | Delphi technique                                             | No                                   | No         |
| 90 | Yang et al.   | 2018 | China              | Neighborhood    | Urban and rural       | 16                   | None                    | Before            | Distance from the group leader | Shannon entropy methods                      | Delphi technique                                             | No                                   | No         |
| 91 | Yoon et al.   | 2014 | South Korea        | Group of cities | Urban and rural       | 15                   | None                    | Before            | Unspecified                    | Linear                                       | Unspecified                                                  | No                                   | No         |
| 92 | Zachos et al. | 2016 | United States      | Neighborhood    | Urban and rural       | 15                   | None                    | Before            | Ranking                        | Linear                                       | Division by total                                            | No                                   | No         |
| 93 | Zeng et al.   | 2016 | China              | Neighborhood    | Rural                 | 15                   | None                    | Before            | Min-Max                        | Linear                                       | Analytical Hierarchy Process (AHP) and entropy weight method | No                                   | No         |
| 94 | Zhang and You | 2014 | China              | City            | Urban and rural       | 36                   | PCA                     | Before            | Min-Max                        | Linear                                       | Equal weighting                                              | Yes (sensitivity)                    | No         |
| 95 | Zhang et al.  | 2018 | China              | Neighborhood    | Urban                 | 9                    | None                    | Before            | Unspecified                    | Non-parametric DEA method                    | PCA – weighted by factor scores                              | No                                   | No         |
